# Supplementary figures and images for: Characterization and Antibacterial Activity of Biosynthesized Silver Nanoparticles Using the Ethanolic Extract of Pelargonium sidoides DC
Source: Hindawi journal article supplement (doi:10.1155/2019/3501234), 2019-12-28

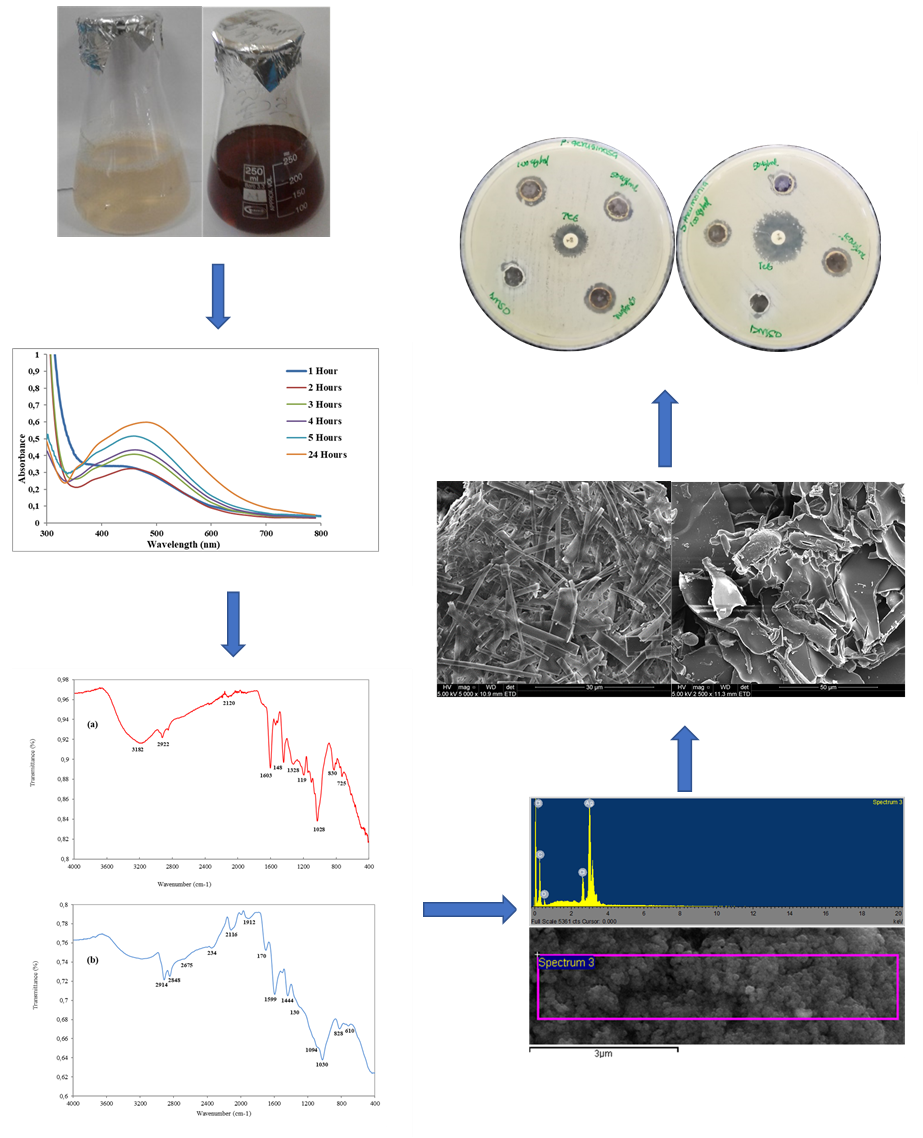

Supplement: f1 [file 3501234.f1.docx]
